# Supplementary material for: Factors associated with risk behaviors in adolescence: a systematic review
Source: PubMed Central journal article supplement — Braz J Psychiatry. 2020 Aug 3;43(2):210–21. doi: 10.1590/1516-4446-2019-0835 (PMC8023154; doi:10.1590/1516-4446-2019-0835), 2020-08-03
Supplement: bjp-43-02-210-s001.pdf [file bjp-43-02-210-s001.pdf]

**Online-only supplementary material****Authors' contributions**

ABB contributed to the study design, data collection, analysis and interpretation of data and drafting the manuscript. JMM contributed to the study design and data collection. RS contributed to the study design and data collection, analysis and interpretation. AB contributed to drafting the manuscript. AM contributed to the study design, data collection, analysis and interpretation, and drafting the manuscript. All authors read and approved the final draft.

**Table S1** Characteristics of the 249 eligible studies, n (%)

| Characteristic          | Risk behavior          |                              |                                           |                                                         |                                       |                                    |
|-------------------------|------------------------|------------------------------|-------------------------------------------|---------------------------------------------------------|---------------------------------------|------------------------------------|
|                         | All studies<br>(N=249) | Substance<br>use<br>(N= 113) | Aggressiveness<br>and violence<br>(N= 35) | Self-harm, depressive,<br>suicidal behavior<br>(N = 54) | Multiple risk<br>behavior<br>(N = 21) | Sexual risk<br>behavior<br>(N= 26) |
| Country                 |                        |                              |                                           |                                                         |                                       |                                    |
| USA                     | 112 (45.0)             | 48 (42.0)                    | 23 (65.7)                                 | 19 (35.0)                                               | 7 (33.0)                              | 15 (57.6)                          |
| UK                      | 37 (15.0)              | 14 (12.0)                    | 2 (5.7)                                   | 16 (29.6)                                               | 2 (9.5)                               | 3 (11.5)                           |
| Australia               | 24 (10.0)              | 13 (12.0)                    | 3 (8.6)                                   | 4 (7.4)                                                 | 2 (9.5)                               | 2 (7.9)                            |
| Other                   | 76 (30.0)              | 38 (34.0)                    | 7 (20.0)                                  | 15 (28.0)                                               | 10 (48.0)                             | 6 (23.0)                           |
| Sample sex              |                        |                              |                                           |                                                         |                                       |                                    |
| Only male               | 8 (3.2)                | 1 (1.0)                      | 2 (5.7)                                   | 3 (5.5)                                                 | 1 (4.8)                               | 1(3.8)                             |
| Only female             | 17 (6.8)               | 3 (2.6)                      | 1 (2.9)                                   | 2 (3.8)                                                 | 4 (19.0)                              | 7 (27.0)                           |
| Both                    | 224 (90.0)             | 109 (96.4)                   | 32 (91.4)                                 | 49 (90.7)                                               | 16 (76.2)                             | 18 (69.2)                          |
| Sample age              |                        |                              |                                           |                                                         |                                       |                                    |
| 10-14                   | 96 (38.5)              | 51 (45.1)                    | 14 (40.0)                                 | 18 (33.4)                                               | 8 (38.0)                              | 5 (19.0)                           |
| 15-19                   | 78 (31.4)              | 29 (25.7)                    | 9 (25.7)                                  | 19 (35.1)                                               | 6 (28.5)                              | 15 (58.0)                          |
| other                   | 75 (30.1)              | 33 (29.2)                    | 12 (34.3)                                 | 17 (31.5)                                               | 7 (33.5)                              | 6 (23.0)                           |
| Survey method           |                        |                              |                                           |                                                         |                                       |                                    |
| Personal interview      | 57 (23.0)              | 22 (19.4)                    | 5 (14.3)                                  | 15 (27.8)                                               | 7 (33.5)                              | 8 (30.7)                           |
| Self report             | 155 (62.2)             | 84 (74.4)                    | 17 (48.5)                                 | 32 (59.2)                                               | 9 (42.8)                              | 13 (50.0)                          |
| Parents report          | 6 (2.4)                | ---                          | 5 (14.2)                                  | ---                                                     | 1 (4.8)                               | ---                                |
| Parents and self-report | 18 (7.2)               | 7 (6.2)                      | 3 (8.6)                                   | 4 (7.5)                                                 | 3 (14.2)                              | 1 (3.8)                            |
| Official data/other     | 13 (5.2)               | ---                          | 5 (14.4)                                  | 3 (5.5)                                                 | 1 (4.7)                               | 4 (15.5)                           |
| Years of follow-up      |                        |                              |                                           |                                                         |                                       |                                    |
| ≤ 10 years              | 193 (77.5)             | 90 (79.6)                    | 22 (63.0)                                 | 44 (81.5)                                               | 13 (62.0)                             | 24 (92.3)                          |
| > 10 years              | 56 (22.5)              | 23 (20.4)                    | 13 (37.0)                                 | 10 (18.5)                                               | 8 (38.0)                              | 2 (7.7)                            |

|                                                                        |            |            |           |           |           |           |  |
|------------------------------------------------------------------------|------------|------------|-----------|-----------|-----------|-----------|--|
| Loss to follow up                                                      |            |            |           |           |           |           |  |
| <20%                                                                   | 103 (41.4) | 42 (37.1)  | 15 (42.8) | 22 (40.7) | 12 (57.0) | 12 (46.0) |  |
| 20-50%                                                                 | 56 (22.5)  | 26 (23.0)  | 5 (14.2)  | 19 (35.2) | 3 (14.0)  | 3 (11.5)  |  |
| >=50%                                                                  | 9 (3.6)    | 5 (4.5)    | 2 (6.0)   | 1 (1.9)   | ---       | 1 (4.0)   |  |
| Not reported                                                           | 81 (32.5)  | 40 (35.4)  | 13 (37.0) | 12 (22.2) | 6 (29.0)  | 10 (38.5) |  |
| Exposure                                                               |            |            |           |           |           |           |  |
| Distal risk factor                                                     | 56 (22.5)  | 24 (21.2)  | 15 (43.0) | 8 (14.8)  | 7 (33.0)  | 2 (7.7)   |  |
| Distal protective factor                                               | 3 (1.2)    | 2(1.8)     | ---       | ---       | ---       | ---       |  |
| Proximal risk factor                                                   | 191 (76.0) | 88 (78.0)  | 20 (57.0) | 44 (81.5) | 14 (67.0) | 25 (96.2) |  |
| Proximal protective factor                                             | 5 (2.0)    | 2 (1.8)    | 1 (3.0)   | 2 (3.7)   | ---       | ---       |  |
| Exposure type                                                          |            |            |           |           |           |           |  |
| Sociodemographic factors                                               | 44 (17.6)  | 21 (18.6)  | 8 (22.8)  | 4 (7.4)   | 5 (23.8)  | 6 (23)    |  |
| Neighborhood/school/ peers                                             | 37 (15.0)  | 17 (15.0)  | 6 (17.0)  | 9 (16.6)  | 3 (14.3)  | 2 (7.7)   |  |
| Family patterns                                                        | 51 (20.4)  | 29 (25.7)  | 6 (17.0)  | 7 (12.9)  | 5 (23.8)  | 4 (15.4)  |  |
| Maternal behavior and/or biological factors                            | 25 (10.0)  | 14 (12.4)  | 7 (20.0)  | 2 (3.7)   | 2 (9.5)   |           |  |
| Early childhood experiences/factors                                    | 16 (6.4)   | 5 (4.4)    | 4 (11.4)  | 4 (7.4)   | 1 (4.7)   | 2 (7.7)   |  |
| Birth complications                                                    | 5 (2.0)    | ---        | 4 (11.4)  | 1 (1.8)   | ---       | ---       |  |
| Child individual factors/experiences                                   | 16 (6.4)   | 4 (3.5)    | 6 (17.0)  | 2 (3.7)   | 1 (4.8)   | 3 (11.5)  |  |
| Adolescent individual factors (other risk behavior or mental disorder) | 62 (25.0)  | 32 (28.3)  | 3 (8.5)   | 18 (33.3) | 2 (9.5)   | 7 (27.0)  |  |
| Other adolescent individual factors                                    | 38 (15.2)  | 13 (11.5)  | 2 (5.7)   | 12 (22.2) | 4 (19.0)  | 7 (27.0)  |  |
| Analysis adjusted for covariates                                       |            |            |           |           |           |           |  |
| Yes                                                                    | 192 (77.0) | 85 (75.2)  | 24 (68.5) | 45 (83.4) | 19 (90.4) | 19 (73.0) |  |
| No                                                                     | 57 (23.0)  | 28 (24.8)  | 11 (31.5) | 9 (16.6)  | 2 (9.6)   | 7 (27.0)  |  |
| NOS quality                                                            |            |            |           |           |           |           |  |
| Good quality                                                           | 151 (60.6) | 64 (56.6)  | 17 (48.5) | 40 (74.0) | 13 (62.0) | 17(65.3)  |  |
| Fair quality                                                           | 64 (25.7)  | 29 (25.7)  | 13 (37.0) | 11 (20.0) | 4 (19.0)  | 7 (27.0)  |  |
| Poor quality                                                           | 34 (13.7)  | 20 (17.7)  | 5 (14.5)  | 3 (6.0)   | 4 (19.0)  | 2 (7.7)   |  |
| Study design                                                           |            |            |           |           |           |           |  |
| Prospective                                                            | 237 (95.0) | 109 (96.5) | 31 (88.5) | 53 (98.0) | 20 (95.0) | 24 (92.3) |  |
| Retrospective                                                          | 12 (5.0)   | 4 (3.5)    | 4 (11.5)  | 1 (2.0)   | 1 (5.0)   | 2 (7.7)   |  |
| Publication year                                                       |            |            |           |           |           |           |  |
| < 1995                                                                 | 16 (6.5)   | 8 (7.0)    | 5 (14.0)  | 1 (1.8)   | 2 (9.5)   | ---       |  |
| 1995-1999                                                              | 15 (6.0)   | 5 (4.5)    | 3 (9.0)   | 5 (9.2)   | ---       | 2 (7.7)   |  |
| 2000-2018                                                              | 218 (87.5) | 100 (88.5) | 27 (77.0) | 48 (89.0) | 19 (90.5) | 24 (92.3) |  |
